# Supplementary material for: Integrative analysis of Multiple Sclerosis using a systems biology approach
Source: PubMed Central journal article supplement (PMC5884799; doi:10.1038/s41598-018-24032-8), 2018-04-04
Supplement: 41598_2018_24032_MOESM1_ESM.pdf [file 41598_2018_24032_MOESM1_ESM.pdf]

# Integrative analysis of Multiple Sclerosis using a systems biology approach

*Supplementary data*

Karla Cervantes-Gracia<sup>1</sup> and Holger Husi<sup>2,3\*</sup>

<sup>1</sup>University of Monterrey, Health Sciences Division, Monterrey, 66238, Mexico.

<sup>2</sup>Institute of Cardiovascular and Medical Sciences, BHF Glasgow Cardiovascular Research Centre, University of Glasgow, Glasgow, G12 8TA, UK

<sup>3</sup>Department of Diabetes and Cardiovascular Science, University of the Highlands and Islands, Centre for Health Science, Inverness IV2 3JH, UK

\*Holger.Husi@glasgow.ac.uk

**Table S1** Description of gene expression profile studies included in this work.

| GEO-ID   | EXPREF       | PMID     | Profile | Groups | Case | Control | Disease case        | Disease control           | Treatment           | Tissue | Subcell     | Platform                 |
|----------|--------------|----------|---------|--------|------|---------|---------------------|---------------------------|---------------------|--------|-------------|--------------------------|
| GSE53716 | Exp24850724  | 24850724 | mRNA    | 12     | 6    | 6       | CIS                 | Baseline                  | IFN- $\beta$ -1a    | Blood  |             | Affymetrix GPL570        |
| GSE26484 | Exp22491253  | 22491253 | mRNA    | 10     | 6    | 4       | RRMS                | Healthy                   |                     | Blood  |             | Affymetrix GPL570        |
| GSE16461 | Exp21216829  | 21216829 | mRNA    | 8      | 4    | 4       | RRMS/SPMS           | Healthy                   |                     | Blood  | CD4+/CD8+   | Affymetrix GPL570        |
| GSE26104 | Exp21886806  | 21886806 | mRNA    | 32     | 24   | 8       | RRMS                | Baseline                  | IFN- $\beta$ -1b/1a | Blood  |             | Affymetrix GPL570        |
| GSE24427 | Exp20136355  | 20136355 | mRNA    | 125    | 100  | 25      | RRMS                | RRMS                      | rIFN- $\beta$ -1b   | Blood  |             | Affymetrix GPL96 & GPL97 |
| GSE23205 | Exp20921521  | 20921521 | mRNA    | 10     | 6    | 4       | PPMS/Risk haplotype | PPMS/Protective haplotype |                     | Blood  |             | Affymetrix GPL570        |
| GSE21942 | Exp22021740  | 22021740 | mRNA    | 27     | 12   | 15      | MS                  | Healthy                   |                     | Blood  |             | Affymetrix GPL570        |
| GSE23832 | Exp21346816  | 21346816 | mRNA    | 12     | 8    | 4       | MS                  | Healthy                   |                     | Blood  |             | Affymetrix GPL6244       |
| GSE5574  | Exp17467740  | 17467740 | mRNA    | 15     | 10   | 5       | RRMS                | RRMS                      | IFN- $\beta$ -1a    | Blood  |             | GE Healthcare GPL4191    |
| GSE27688 | Exp22252466A | 22252466 | mRNA    | 26     | 16   | 10      | RRMS/SPMS           | Healthy                   | aHSCT               | Blood  | CD34+/CD34- | Agilent GPL6480          |
| GSE43591 | Exp23895517A | 23895517 | mRNA    | 19     | 10   | 9       | RRMS                | Healthy                   |                     | Blood  | T-cells     | Affymetrix GPL570        |
| GSE21079 | Exp20711463  | 20711463 | miRNA   | 96     | 59   | 37      | RRMS/SPMS/PPMS      | Healthy                   |                     | Blood  |             | Illumina GPL8178         |
| GSE74579 | Exp26831009  | 26831009 | miRNA   | 72     | 48   | 24      | RRMS                | Healthy                   |                     | Blood  |             | Affymetrix GPL8786       |
| GSE43590 | Exp23895517B | 23895517 | miRNA   | 20     | 11   | 9       | RRMS                | Healthy                   | IFN- $\beta$        | Blood  |             | Affymetrix GPL14613      |
| GSE46282 | Exp23921681B | 23921681 | miRNA   | 24     | 18   | 6       | RRMS/CIS            | Baseline                  | IFN- $\beta$ -1b    | Blood  |             | TaqMan GPL13328          |
| GSE46283 | Exp23921681C | 23921681 | miRNA   | 6      | 3    | 3       | RRMS/CIS            | Baseline                  | IFN- $\beta$ -1b    | Blood  |             | Affymetrix GPL14613      |
| GSE27690 | Exp22252466B | 22252466 | miRNA   | 9      | 4    | 5       | SPMS                | Healthy                   | aHSCT               | Blood  | CD34+       | Agilent GPL10850         |
| GSE17846 | Exp19823682  | 19823682 | miRNA   | 41     | 20   | 21      | RRMS                | Healthy                   |                     | Blood  |             | Febit GPL9040            |

**Table S2** Gene expression profile studies - Dataset groups characteristics.

| DEMOGRAPHREF  | EXPREF      | Group Size | Treatment           | Group classifier | Label                                 | Gender     |
|---------------|-------------|------------|---------------------|------------------|---------------------------------------|------------|
| Dem24850724a  | Exp24850724 | 6          | IFN- $\beta$ -1a    | CIS              | Before treatment (baseline)           |            |
| Dem24850724b  | Exp24850724 | 6          | IFN- $\beta$ -1a    | CIS              | 365 days follow-up                    |            |
| Dem22491253a  | Exp22491253 | 4          |                     | Healthy          | Control                               |            |
| Dem22491253b  | Exp22491253 | 3          |                     | RRMS             | High Sema4A                           |            |
| Dem22491253c  | Exp22491253 | 3          |                     | RRMS             | Low Sema4A                            |            |
| Dem21216829a  | Exp21216829 | 4          |                     | Healthy          | CD4+ (Control monozygotic twin)       | 2/6 (M/F)  |
| Dem21216829b  | Exp21216829 | 4          |                     | Healthy          | CD8+ (Control monozygotic twin)       | 2/6 (M/F)  |
| Dem21216829c  | Exp21216829 | 4          |                     | RRMS/SPMS        | CD4+ (3 RRMS/1 SPMS monozygotic twin) | 2/6 (M/F)  |
| Dem21216829d  | Exp21216829 | 4          |                     | RRMS/SPMS        | CD8+ (3 RRMS/1 SPMS monozygotic twin) | 2/6 (M/F)  |
| Dem21886806a  | Exp21886806 | 8          | IFN- $\beta$ -1b/1a | RRMS             | Before treatment (baseline)           | 0/8 (M/F)  |
| Dem21886806b  | Exp21886806 | 4          | IFN- $\beta$ -1b    | RRMS             | 91 days follow-up                     | 0/4 (M/F)  |
| Dem21886806c  | Exp21886806 | 4          | IFN- $\beta$ -1b    | RRMS             | 365 days follow-up                    | 0/4 (M/F)  |
| Dem21886806d  | Exp21886806 | 4          | IFN- $\beta$ -1b    | RRMS             | 730 days follow-up                    | 0/4 (M/F)  |
| Dem21886806e  | Exp21886806 | 4          | IFN- $\beta$ -1a    | RRMS             | 91 days follow-up                     | 0/4 (M/F)  |
| Dem21886806f  | Exp21886806 | 4          | IFN- $\beta$ -1a    | RRMS             | 365 days follow-up                    | 0/4 (M/F)  |
| Dem21886806g  | Exp21886806 | 4          | IFN- $\beta$ -1a    | RRMS             | 730 days follow-up                    | 0/4 (M/F)  |
| Dem20136355a  | Exp20136355 | 25         | rIFN- $\beta$ -1b   | RRMS             | Before treatment (baseline)           | 9/16 (M/F) |
| Dem20136355b  | Exp20136355 | 25         | rIFN- $\beta$ -1b   | RRMS             | 2 days follow-up                      | 9/16 (M/F) |
| Dem20136355c  | Exp20136355 | 25         | rIFN- $\beta$ -1b   | RRMS             | 30 days follow-up                     | 9/16 (M/F) |
| Dem20136355d  | Exp20136355 | 25         | rIFN- $\beta$ -1b   | RRMS             | 365 days follow-up                    | 9/16 (M/F) |
| Dem20136355e  | Exp20136355 | 25         | rIFN- $\beta$ -1b   | RRMS             | 730 days follow-up                    | 9/16 (M/F) |
| Dem20136355aa | Exp20136355 | 25         | rIFN- $\beta$ -1b   | RRMS             | Before treatment (baseline)           | 9/16 (M/F) |
| Dem20136355bb | Exp20136355 | 25         | rIFN- $\beta$ -1b   | RRMS             | 2 days follow-up                      | 9/16 (M/F) |
| Dem20136355cc | Exp20136355 | 25         | rIFN- $\beta$ -1b   | RRMS             | 30 days follow-up                     | 9/16 (M/F) |
| Dem20136355dd | Exp20136355 | 25         | rIFN- $\beta$ -1b   | RRMS             | 365 days follow-up                    | 9/16 (M/F) |
| Dem20136355ee | Exp20136355 | 25         | rIFN- $\beta$ -1b   | RRMS             | 730 days follow-up                    | 9/16 (M/F) |
| Dem20921521a  | Exp20921521 | 4          |                     | PPMS             | PRF1 gene/Protective haplotype        | 4/0 (M/F)  |
| Dem20921521b  | Exp20921521 | 6          |                     | PPMS             | PRF1 gene/Risk haplotype              | 6/0 (M/F)  |
| Dem22021740a  | Exp22021740 | 15         |                     | Healthy          | Control                               | 0/15 (M/F) |

|               |              |    |                                    |           |                             |             |
|---------------|--------------|----|------------------------------------|-----------|-----------------------------|-------------|
| Dem22021740b  | Exp22021740  | 12 |                                    | MS        | Case                        | 0/12 (M/F)  |
| Dem21346816a  | Exp21346816  | 4  |                                    | Healthy   | Control                     |             |
| Dem21346816b  | Exp21346816  | 8  |                                    | MS        | Case                        |             |
| Dem17467740a  | Exp17467740  | 5  | IFN- $\beta$ -1a                   | RRMS      | Before treatment (baseline) |             |
| Dem17467740b  | Exp17467740  | 5  | IFN- $\beta$ -1a                   | RRMS      | 1 days follow-up            |             |
| Dem17467740c  | Exp17467740  | 5  | IFN- $\beta$ -1a                   | RRMS      | 182 days follow-up          |             |
| Dem23921681Ba | Exp23921681B | 6  | IFN- $\beta$ -1b                   | RRMS/CIS  | Before treatment (baseline) | 0/6 (M/F)   |
| Dem23921681Bb | Exp23921681B | 6  | IFN- $\beta$ -1b                   | RRMS/CIS  | First injection follow-up   | 0/6 (M/F)   |
| Dem23921681Bc | Exp23921681B | 6  | IFN- $\beta$ -1b                   | RRMS/CIS  | Second injection follow-up  | 0/6 (M/F)   |
| Dem23921681Bd | Exp23921681B | 6  | IFN- $\beta$ -1b                   | RRMS/CIS  | 30 days follow-up           | 0/6 (M/F)   |
| Dem23921681Ca | Exp23921681C | 3  | IFN- $\beta$ -1b                   | RRMS/CIS  | Before treatment (baseline) | 0/3 (M/F)   |
| Dem23921681Cb | Exp23921681C | 3  | IFN- $\beta$ -1b                   | RRMS/CIS  | 30 days follow-up           | 0/3 (M/F)   |
| Dem22252466Aa | Exp22252466A | 5  |                                    | Healthy   | CD34+ HPC Control           | 2/3 (M/F)   |
| Dem22252466Ab | Exp22252466A | 8  |                                    | RRMS/SPMS | CD34+ HPC                   | 2/6 (M/F)   |
| Dem22252466Ac | Exp22252466A | 5  |                                    | Healthy   | CD34- HPC Control           | 2/3 (M/F)   |
| Dem22252466Ad | Exp22252466A | 8  |                                    | RRMS/SPMS | CD34- HPC                   | 2/6 (M/F)   |
| Dem22252466Ba | Exp22252466B | 5  |                                    | Healthy   | CD34+ HPC Control           | 2/3 (M/F)   |
| Dem22252466Bb | Exp22252466B | 4  |                                    | MS        | CD34+ HPC                   | 0/4 (M/F)   |
| Dem23895517Aa | Exp23895517A | 9  |                                    | Healthy   | T-cells Control             | 4/5 (M/F)   |
| Dem23895517Ab | Exp23895517A | 10 |                                    | RRMS      | T-cells                     | 6/4 (M/F)   |
| Dem23895517Ba | Exp23895517B | 9  |                                    | Healthy   | Control                     | 4/5 (M/F)   |
| Dem23895517Bb | Exp23895517B | 11 | IFN- $\beta$                       | RRMS      | Case                        | 1/10 (M/F)  |
| Dem20711463a  | Exp20711463  | 37 |                                    | Healthy   | Control                     |             |
| Dem20711463b  | Exp20711463  | 24 |                                    | RRMS      | Case                        |             |
| Dem20711463c  | Exp20711463  | 17 |                                    | SPMS      | Case                        |             |
| Dem20711463d  | Exp20711463  | 18 |                                    | PPMS      | Case                        |             |
| Dem26831009a  | Exp26831009  | 24 |                                    | Healthy   | Control                     | 10/14 (M/F) |
| Dem26831009b  | Exp26831009  | 24 |                                    | RRMS      | Relapse stage               | 10/14 (M/F) |
| Dem26831009c  | Exp26831009  | 24 |                                    | RRMS      | Remission stage             | 10/14 (M/F) |
| Dem19823682a  | Exp19823682  | 21 |                                    | Healthy   | Control                     |             |
| Dem19823682b  | Exp19823682  | 20 | IFN- $\beta$ or Glatiramer acetate | RRMS      | Case                        |             |

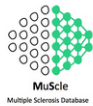

## Welcome to the Multiple Sclerosis (MuScle) database

MuScle is a multiple sclerosis data base integrated by data curated and mined from large scale studies (genomic & miRNA).

This cluster of datasets, as well as its statistical analyses and crossmapping with other databases through CluSO (gene/protein cluster) was created to perform a systems biology approach. Promising outcomes of the implementation of an integrative approach, through gene ontologies and pathway analyses along with their interaction allow us to reach a potential data-driven hypothesis.

By the data mining of multiple sclerosis studies carry out in MuScle, plus the addition of multi-omic levels of information, its analyses can give rise to a more complete and meaningful biological connexion among the different processes and mechanisms involved in the disease, as well as the unravelling of the key elements involved in its manifestation and progression.

### Database access via:

Query:     
Search for:  Molecules  Tissue or Source  Disease  
 Case sensitive

or Browse (client-side search)

- [Study](#)
- [Sample](#)
- [Tissue](#)
- [Disease](#)
- Molecules, [grouped \(search\)](#)

Select first letter of gene name to jump to the right entry list

[A](#) [B](#) [C](#) [D](#) [E](#) [F](#) [G](#) [H](#) [I](#) [J](#) [K](#) [L](#) [M](#) [N](#) [O](#) [P](#) [Q](#) [R](#) [S](#) [T](#) [U](#) [V](#) [W](#) [X](#) [Y](#) [Z](#) | [1](#) | [2](#) | [3](#) | [4](#) | [5](#) | [6](#) | [7](#) | [8](#) | [9](#) | [other](#)

### Current stats:

|                                                      |                                                     |                                                   |
|------------------------------------------------------|-----------------------------------------------------|---------------------------------------------------|
| Total number of molecule entries (redundant): 105543 | Total number of studies listed in the database: 19  | Total number of samples in Demographics file: 64  |
| Number of unique (non-redundant) molecules: 34260    | Number of unique studies listed in the database: 19 | Number of unique samples in Demographics file: 64 |

## MuScle - Study list

Show 10 entries

Search:

| Study ID                     | Tissue / Source | Disease            | # of molecules | PMID/DOI                 |
|------------------------------|-----------------|--------------------|----------------|--------------------------|
| <a href="#">Exp23921681B</a> | Blood           | Multiple sclerosis | 17             | <a href="#">23921681</a> |
| <a href="#">Exp22252466B</a> | Blood           | Multiple sclerosis | 46             | <a href="#">22252466</a> |
| <a href="#">Exp23921681C</a> | Blood           | Multiple sclerosis | 173            | <a href="#">23921681</a> |
| <a href="#">Exp20711463</a>  | Blood           | Multiple sclerosis | 254            | <a href="#">20711463</a> |
| <a href="#">Exp26831009</a>  | Blood           | Multiple sclerosis | 262            | <a href="#">26831009</a> |
| <a href="#">Exp19823682</a>  | Blood           | Multiple sclerosis | 271            | <a href="#">19823682</a> |
| <a href="#">Exp23895517B</a> | Blood           | Multiple sclerosis | 322            | <a href="#">23895517</a> |
| <a href="#">Exp21346816</a>  | Blood           | Multiple sclerosis | 523            | <a href="#">21346816</a> |
| <a href="#">Exp24850724</a>  | Blood           | Multiple sclerosis | 1880           | <a href="#">24850724</a> |
| <a href="#">Exp23921681A</a> | Blood           | Multiple sclerosis | 2284           | <a href="#">23921681</a> |

Showing 1 to 10 of 19 entries

Previous   Next

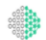

## MuScle - Study ID [Exp23921681B](#)

|           |                                                                                                                                                                                                                                                                                                                                                                                                                                                                                                                  |
|-----------|------------------------------------------------------------------------------------------------------------------------------------------------------------------------------------------------------------------------------------------------------------------------------------------------------------------------------------------------------------------------------------------------------------------------------------------------------------------------------------------------------------------|
| PubMed ID | <a href="#">23921681</a>                                                                                                                                                                                                                                                                                                                                                                                                                                                                                         |
| Authors   | Hecker M, Thamarasam M, Koczan D, Schroder J et al.                                                                                                                                                                                                                                                                                                                                                                                                                                                              |
| Title     | MicroRNA expression changes during interferon-beta treatment in the peripheral blood of multiple sclerosis patients.                                                                                                                                                                                                                                                                                                                                                                                             |
| Journal   | Int J Mol Sci                                                                                                                                                                                                                                                                                                                                                                                                                                                                                                    |
| Abstract  | The purpose of this study was to investigate the expression dynamics of mRNAs and microRNAs in response to subcutaneous IFN-beta-1b treatment (Betaferon, 250 microg every other day) in patients with clinically isolated syndrome (CIS) suggestive of multiple sclerosis (MS) or relapsing-remitting type of the disease (RRMS). By using Affymetrix microarrays, we obtained microRNA expression profiles of peripheral blood mononuclear cells from 3 patients within the first month of IFN-beta treatment. |

### Sample characteristics

| Species      | Tissue / Source | Compartment       | Disease            | N  | Sample                                                                                                                        |
|--------------|-----------------|-------------------|--------------------|----|-------------------------------------------------------------------------------------------------------------------------------|
| Homo sapiens | Blood           | Mononuclear cells | Multiple sclerosis | 24 | <a href="#">Dem23921681Ba</a> , <a href="#">Dem23921681Bb</a> , <a href="#">Dem23921681Bc</a> , <a href="#">Dem23921681Bd</a> |

### Sample description and preparation

|                   |                             |
|-------------------|-----------------------------|
| N (case)          | 18                          |
| N (control)       | 6                           |
| Disease (case)    | RRMS/CIS                    |
| Disease (control) | Before treatment (baseline) |
| Disease induction | IFN-Beta-1b                 |

### Sample detection

|                  |                                             |
|------------------|---------------------------------------------|
| Array version    | TaqMan(r) Array Human MicroRNA A Cards v2.0 |
| Platform         | TaqMan GPL13328                             |
| Reference source | GSE46282                                    |

### Molecule list

Show 10 entries

Search:

| Molecule ID           | ext | External ID                     | Gene    | Name                            | Source acc                 | Regulation (case/control) | Scores           |
|-----------------------|-----|---------------------------------|---------|---------------------------------|----------------------------|---------------------------|------------------|
| <a href="#">BZ187</a> |     | <a href="#">ENSG00000199059</a> | MIR135B | Homo sapiens miR-135b stem-loop | 80.hsa-miR-135b-4395372    | ratio: 0.45               | p-value: 0.03786 |
| <a href="#">BZ233</a> |     | <a href="#">ENSG00000207990</a> | MIR182  | Homo sapiens miR-182 stem-loop  | 106.hsa-miR-182-4395445    | ratio: 0.45               | p-value: 0.02152 |
| <a href="#">BZ349</a> |     | <a href="#">ENSG00000226380</a> | MIR29A  | Homo sapiens miR-29a stem-loop  | 37.hsa-miR-29a-4395223     | ratio: 0.67               | p-value: 0.0401  |
| <a href="#">BZ357</a> |     | <a href="#">ENSG00000249532</a> | MIR302B | Homo sapiens miR-302b stem-loop | 156.hsa-miR-302b-4378071   | ratio: 14.85              | p-value: 0.0179  |
| <a href="#">BZ371</a> |     | <a href="#">ENSG00000199177</a> | MIR31   | Homo sapiens miR-31 stem-loop   | 42.hsa-miR-31-4395390      | ratio: 0.60               | p-value: 0.0178  |
| <a href="#">BZ511</a> |     | <a href="#">ENSG00000207839</a> | MIR33B  | Homo sapiens miR-33b stem-loop  | 44.hsa-miR-33b-4395196     | ratio: 0.24               | p-value: 0.0182  |
| <a href="#">BZ536</a> |     | <a href="#">ENSG00000208015</a> | MIR362  | Homo sapiens miR-362 stem-loop  | 182.hsa-miR-362-5p-4378092 | ratio: 0.71               | p-value: 0.0489  |
| <a href="#">BZE69</a> |     | <a href="#">ENSG00000208028</a> | MIR616  | Homo sapiens miR-616 stem-loop  | 320.hsa-miR-616-4395525    | ratio: 5.18               | p-value: 0.04949 |
| <a href="#">BZ199</a> |     | <a href="#">ENSG00000207807</a> | MIR95   | Homo sapiens miR-95 stem-loop   | 49.hsa-miR-95-4373011      | ratio: 0.66               | p-value: 0.01686 |
| <a href="#">BZ186</a> |     | hsa-miR-380-3p                  |         | hsa-miR-380-3p                  | 199.hsa-miR-380-4373022    | ratio: 0.05               | p-value: 0.00512 |

Showing 1 to 10 of 17 entries

Previous   Next

Compile date 09-07-2016

© MuScle project

**Figure S1** Page-views of the multiple sclerosis database (MuScle). The database is organised and can be accessed by type of study (the study “Exp23921681B” is highlighted in red as an example how the information of the study is stored and displayed in the MuScle database), sample (handles clinical information), tissue/fluid source and by specific queries of molecules. Available at <http://www.padb.org/muscle/>.
